# Supplementary material for: Functionalization and higher-order organization of liposomes with DNA nanostructures
Source: PubMed Central journal article supplement (PMC10465589; doi:10.1038/s41467-023-41013-2), 2023-08-29
Supplement: 41467_2023_41013_MOESM4_ESM.pdf [file 41467_2023_41013_MOESM4_ESM.pdf]

## **Description of Additional Supplementary files**

File name: Supplementary Movie 1

Description: 7 cryo tomo slice of tile-mediated liposome cluster.
